# Supplementary material for: Computational Investigations on Acceptor Substituent Influence of Metal-free Efficient Chromophores for Optoelectronic Properties
Source: Research Square preprint supplement (doi:10.21203/rs.3.rs-1270976/v2), 2022-09-06
Supplement: Supplementary file 1 [file 073f852d6eb56e8351e68955.docx]

**Table 1**

Literature absorption data, computed excitation wavelength ( in nm), oscillator strength (f) and orbitals configuration of the C1-1 dye were performed in ethanol solution with TD-DFT method.

| **Methods** | **(nm)** | **Oscillator Strength (f)** | **Main configuration (%)** |
| --- | --- | --- | --- |
| **B3LYP** | 579 | 1.383 | HOMO→LUMO (100%) |
| **CAM-B3LYP** | 477 | 1.790 | HOMO→LUMO (87%) |
| **ωB97XD** | 463 | 1.843 | HOMO→LUMO (80%) |
| **Literature data (C1-1)** | 468 | **Taken from reference [18]** | |

**Table 2**

The HOMOs, LUMOs and energy gap () of the C1-1 and A1-A4 dyes were calculated by the B3LYP/6-31G(d) level of theory.

| **Dyes** | **HOMOs** | **LUMOs** | **Energy gap**  **(****)** |
| --- | --- | --- | --- |
| **in (eV)** | | |
| **C1-1** | -5.03 | -2.50 | 2.53 |
| **A1** | -4.98 | -2.48 | 2.50 |
| **A2** | -5.20 | -2.58 | 2.62 |
| **A3** | -5.35 | -2.60 | 2.75 |

**Table 3**

Computed maximum absorption wavelengths corresponding excitation energy ( in nm and E in eV), Oscillator strength (f in a.u.), Light harvesting efficiency (*LHE*) and major orbitals transition of the studied dyes were calculated by the TD-ωB97XD/6-31G(d) theory with ethanol medium.

| **Dyes** | **Wavelength** | | **Oscillator strength**  **(f)** | ***LHE*** | **Major Transitions** |
| --- | --- | --- | --- | --- | --- |
| **Energy**  **(eV)** | **(nm)** |
| **C1-1** | 2.67 | 463 | 1.843 | 0.985 | HOMO→LUMO (80%) |
| **A1** | 2.53 | 489 | 1.918 | 0.987 | HOMO→LUMO (78%) |
| **A2** | 2.90 | 426 | 1.767 | 0.982 | HOMO→LUMO (80%) |
| **A3** | 3.13 | 396 | 1.907 | 0.987 | HOMO→LUMO (80%) |

**Table 4**

The calculated redox potential of the ground state (in eV), oxidation potential of the dye (in eV), absorption energy ( in eV), free energy change for electron injection
( in eV), dye regeneration ( in eV), open-circuit photovoltage ( in eV), exciton binding energy (), chemical hardness (*η*) and dipole moment ( in Debye) of the studied dye molecules at the TD-ωB97XD/6-31G(d) level of theory in ethanol medium.

| **Dyes** |  |  |  |  |  |  |  | *η* | **(Debye)** |
| --- | --- | --- | --- | --- | --- | --- | --- | --- | --- |
| **(in eV)** | | | | | | | |
| **C1-1** | 5.03 | 2.67 | 2.36 | -1.64 | 0.23 | 1.50 | 0.14 | 1.03 | 10.94 |
| **A1** | 4.98 | 2.53 | 2.45 | -1.55 | 0.18 | 1.52 | 0.13 | 0.98 | 16.58 |
| **A2** | 5.20 | 2.90 | 2.30 | -1.70 | 0.40 | 1.42 | 0.28 | 1.20 | 12.87 |
| **A3** | 5.35 | 3.13 | 2.23 | -1.77 | 0.55 | 1.40 | 0.38 | 1.10 | 6.64 |
